# Supplementary material for: Sensitivity of Rapid Antigen Testing and RT-PCR Performed on Nasopharyngeal Swabs versus Saliva Samples in COVID-19 Hospitalized Patients: Results of a Prospective Comparative Trial (RESTART)
Source: MDPI journal article supplement (doi:10.3390/microorganisms9091910), 2021-09-09
Supplement: s1 [file s1]

**Table S1: Limit of detection (LoD) for dry” versus “wet” swab procedure during the *in vitro* simulation experiment.**

| Type of swab     | Type of test                 | Dil.1 | Dil.2 | Dil.3 | Dil.4 | Dil.5 | Dil.6 | Dil.7 |
|------------------|------------------------------|-------|-------|-------|-------|-------|-------|-------|
| “Dry” – Series 0 | One Step Immunoassay Exdia®  | P     | P*    | N     | N     | N     | N     | N     |
|                  | Standard Q® Roche            | P     | P     | P     | N     | N     | N     | N     |
|                  | Cobas 6800<br>(Ct gene RDRP) | 19.5  | 22.3  | 24.8  | 27.9  | 30.8  | 33.2  | 35.0  |
|                  | Cobas 6800<br>(Ct gene E)    | 19.3  | 22.2  | 25.0  | 27.7  | 30.8  | 33.3  | 35.7  |
| “Wet” – Series A | One Step Immunoassay Exdia®  | P*    | N     | N     | N     | N     | N     | N     |
|                  | Standard Q® Roche            | P     | P     | N     | N     | N     | N     | N     |
|                  | Cobas 6800<br>(Ct gene RDRP) | 24.9  | 27.6  | 30.7  | 32.9  | 35.4  | 36.7  | 37.8  |
|                  | Cobas 6800<br>(Ct gene E)    | 24.7  | 27.4  | 30.8  | 33.2  | 35.5  | 39.5  | 39.6  |
| “Wet” – Series B | One Step Immunoassay Exdia®  | P*    | N     | N     | N     | N     | N     | N     |
|                  | Standard Q® Roche            | P     | N     | N     | N     | N     | N     | N     |
|                  | Cobas 6800<br>(Ct gene RDRP) | 24.4  | 27.5  | 30.4  | 33.0  | 34.7  | 37.1  | N     |
|                  | Cobas 6800<br>(Ct gene E)    | 24.3  | 27.3  | 30.4  | 33.3  | 35.0  | 39.7  | N     |

Series 0 was considered the internal reference for LoD, as if it corresponded to a dry swab. Series A and B were obtained after inoculating a swab, previously immersed in the corresponding tube from series 0, inside VTM tubes, thus simulating the process of wet swab. RT-PCR with Cobas 6800 was used as molecular confirmation and Ct calculation (Dil.= dilution; P= Positive test; N= Negative test; \*= low positivity).
